# Supplementary material for: CircCDK14 Promotes Tumor Progression and Resists Ferroptosis in Glioma by Regulating PDGFRA
Source: PubMed Central journal article supplement (PMC8741855; doi:10.7150/ijbs.66114), 2022-01-01
Supplement: ijbsv18p0841s1.pdf [file ijbsv18p0841s1.pdf]

## Supplementary Information

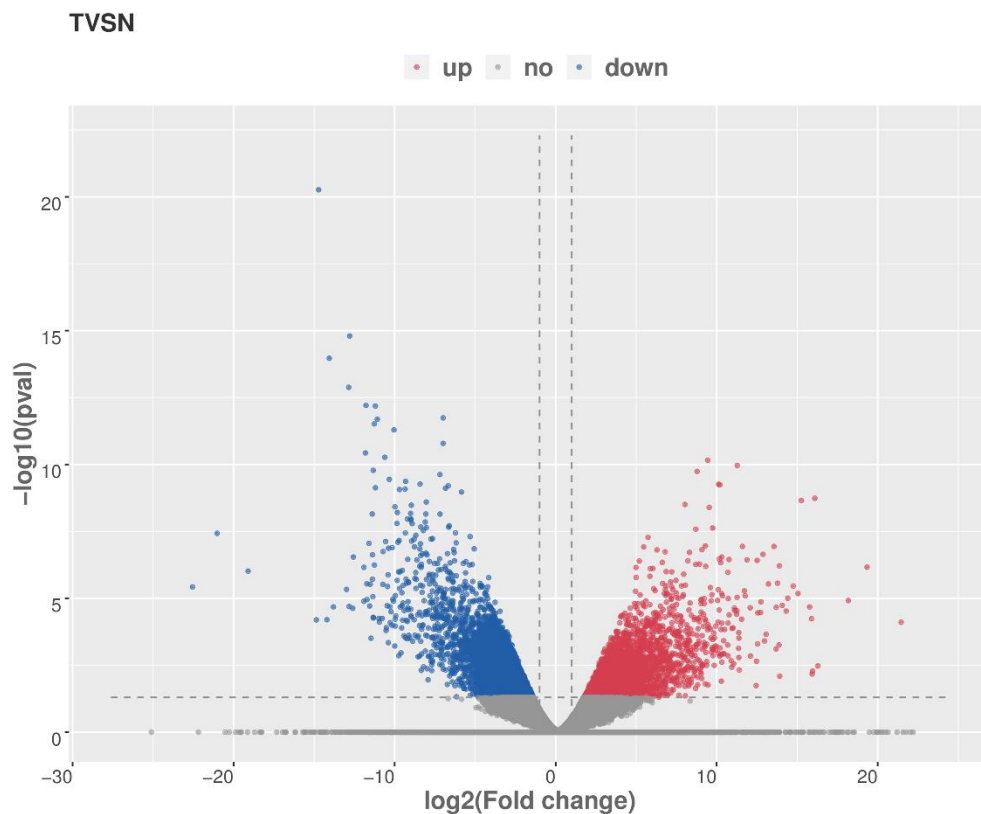

**Supplementary Figure 1. Volcano plot describing the profile of circRNAs expression in glioma tissue and normal brain tissue.**

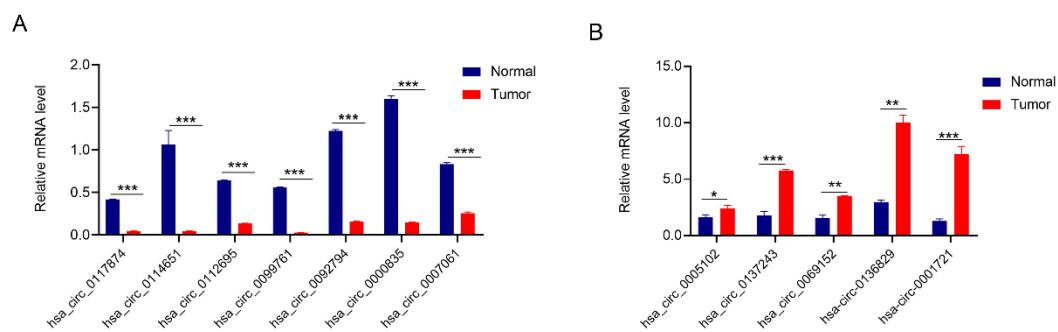

**Supplementary Figure 2. The results of RNA-Seq were confirmed by qPCR in 9 sequencing samples.**

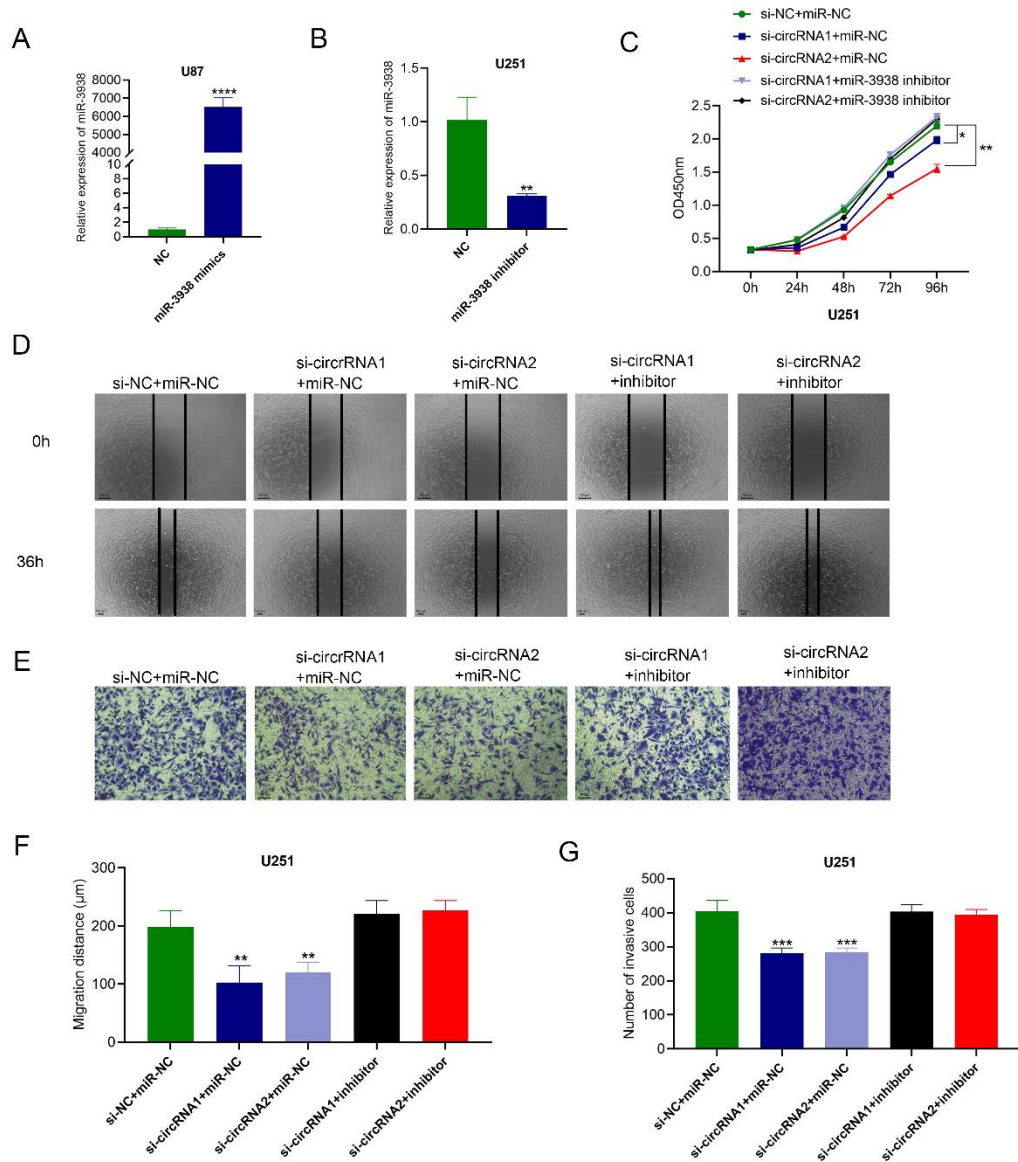

**Supplementary Figure 3. The inhibition of miR-3938 expression could counteract the abilities of proliferation, migration and invasion in circCDK14 knockdown glioma cells.**

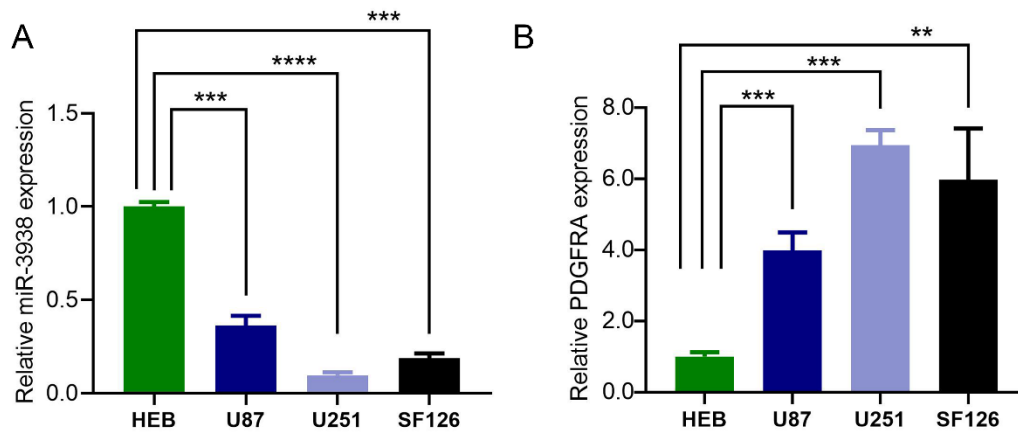

**Supplementary Figure 4. The level of miR-3938 and PDGFRA in glioma cells.**

**Table S1 Primer sequences**

| Genes                   | Primer           | Sequence (5'-3')                                 |
|-------------------------|------------------|--------------------------------------------------|
| circCDK14 (divergence)  | Forward primer   | CTCCTCCACTGGCAAAGAG                              |
|                         | Reverse primer   | GTGTAGACATCTTTGTGACACATATCGAG                    |
| circCDK14 (convergence) | Forward primer   | TGATCAAACCCTGGACACA                              |
|                         | Reverse primer   | GCCAGTGGAGGAGGTCTTAA                             |
| GAPDH (convergence)     | Forward primer   | GTCTCCTCTGACTCAACAGCG                            |
|                         | Reverse primer   | ACCACCCTGTTGCTGTAGCAA                            |
| GAPDH (divergence)      | Forward primer   | TGTTCTGTTTCGTGTGTGAGG                            |
|                         | Reverse primer   | TGTGAGAAGCCTCTGTTCGT                             |
| CDK14                   | Forward primer   | TGTCTTACATCCACCAGCGT                             |
|                         | Reverse primer   | TGTGGCTAGGGACGGATTTT                             |
| has_circ_0117874        | Forward primer   | GAAGGACCATGCTCAGAAGC                             |
|                         | Reverse primer   | ATTAACTCTTCCATTGCAGC                             |
| has_circ_0114651        | Forward primer   | TCACTGCAAAGACCACACAG                             |
|                         | Reverse primer   | GGCGTTCAGTTTCATGCG                               |
| has_circ_0112695        | Forward primer   | GCCATTCAAAGTCTATCCG                              |
|                         | Reverse primer   | GTAACAATCCTGACTTGGTAGCT                          |
| has_circ_0099761        | Forward primer   | AGATCTGGGACTTAGCAGGC                             |
|                         | Reverse primer   | GCAAGCACAAAACCACAGTCTA                           |
| has_circ_0092794        | Forward primer   | TTTCTGGCCTATTAATAACAGATG                         |
|                         | Reverse primer   | TTCGACTGTCTGGGTTTG                               |
| has_circ_0000835        | Forward primer   | ATCCAAGTGGCAATAGGCAT                             |
|                         | Reverse primer   | GCACCTGCAAAGATTCCTC                              |
| has_circ_0007061        | Forward primer   | AATGGTGACAGATCCAGGCA                             |
|                         | Reverse primer   | GATTCAGCAGCCTCCTG                                |
| has_circ_0005102        | Forward primer   | GGGGCAGGCAATAAATGGAGC                            |
|                         | Reverse primer   | AGACTGGACGTCTACAGGC                              |
| has_circ_0137243        | Forward primer   | TTTGCGGAGGAAGACTATAACC                           |
|                         | Reverse primer   | CTTGCCCTCCAGTTT                                  |
| has_circ_0069152        | Forward primer   | GAAGGACCATGCTCAGAAGC                             |
|                         | Reverse primer   | ATTAACTCTTCCATTGCAGC                             |
| has_circ_0136829        | Forward primer   | CAGAAGGCCAGTGGTAGAA                              |
|                         | Reverse primer   | GCTTCTGAGTCAGGTTTCTATTAAAG                       |
| miR-3938                | Stem-loop primer | GTCGTATCCAGTGCAGGGTCCGAGGTATTGCACTGGATACGACCCGGT |
| miR-3938                | Forward primer   | GCGGAATTCCTTGTAGATA                              |
|                         | Reverse primer   | CTCGCTTCGGCAGCACA                                |
| U6                      | Forward primer   | AACGCTTACGAATTTGCGT                              |
|                         | Reverse primer   | CTCGCTTCGGCAGCACA                                |
| PDGFRA                  | Forward primer   | ATGGATTAAGCCGGTCCCAA                             |
|                         | Reverse primer   | TAAATGGGGCCTGACTTGGT                             |

**Table S2 Correlation between circCDK14, miR-3938 expression and clinicopathological features of patients.**

| Characteristics | Case | CircCDK14<br>expression |     | P value | miR-3938<br>expression |     | P value |
|-----------------|------|-------------------------|-----|---------|------------------------|-----|---------|
|                 |      | High                    | low |         | High                   | low |         |
| All cases       | 76   | 37                      | 39  |         | 38                     | 38  |         |
| Age(years)      |      |                         |     | 0.643   |                        |     | 0.486   |
| >50             | 34   | 17                      | 15  |         | 14                     | 18  |         |
| <=50            | 42   | 20                      | 24  |         | 24                     | 20  |         |
| Gender          |      |                         |     | 0.359   |                        |     | 0.358   |
| Male            | 38   | 21                      | 17  |         | 21                     | 16  |         |
| Female          | 38   | 16                      | 22  |         | 17                     | 22  |         |
| Grade           |      |                         |     | 0.027   |                        |     | 0.002   |
| I-II            | 30   | 9                       | 23  |         | 22                     | 8   |         |
| III-IV          | 46   | 28                      | 16  |         | 16                     | 30  |         |
